# Supplementary material
Source: Research Square preprint supplement (doi:10.21203/rs.3.rs-9646306/v1)
Supplement: Supplementary file 1 [file fe3d0576b0adea96bb9aac06.docx]

**Table S1. Full search strategy of MEDLINE (PubMed)**

| **Full Search Query** | **Number of Results** |
| --- | --- |
| ((light adjustable lens) OR (LAL) OR (light adjustable lens+) OR (LAL+)) AND ((cataract surgery) OR (cataract extraction) OR (phacoemulsification) OR (FLACS) OR (SICS) OR (lens exchange) OR (secondary lens) OR (piggy-back) OR (piggyback) OR (intraocular lens) OR (IOL)) | 114 |

FLACS, femtosecond laser-assisted cataract surgery; IOL, intraocular lens; LAL, light adjustable lens; SICS, small incision cataract surgery
